# Supplementary material for: Ultrahigh brilliance quasi-monochromatic MeV γ-rays based on self-synchronized all-optical Compton scattering
Source: PubMed Central journal article supplement (PMC4942800; doi:10.1038/srep29518), 2016-07-13
Supplement: srep29518-s1.pdf [file srep29518-s1.pdf]

# Ultrahigh brilliance quasi-monochromatic MeV $\gamma$ -rays based on self-synchronized all-optical Compton scattering

Changhai Yu<sup>1</sup>, Rong Qi<sup>1</sup>, Wentao Wang<sup>1</sup>, Jiansheng Liu<sup>1,2,\*</sup>, Wentao Li<sup>1</sup>, Cheng Wang<sup>1</sup>, Zhijun Zhang<sup>1</sup>, Jiaqi Liu<sup>1</sup>, Zhiyong Qin<sup>1</sup>, Ming Fang<sup>1</sup>, Ke Feng<sup>1</sup>, Ying Wu<sup>1</sup>, Ye Tian<sup>1</sup>, Yi Xu<sup>1</sup>, Fenxiang Wu<sup>1</sup>, Yuxin Leng<sup>1</sup>, Xiufeng Weng<sup>3</sup>, Jihu Wang<sup>3</sup>, Fuli Wei<sup>3</sup>, Yicheng Yi<sup>3</sup>, Zhaohui Song<sup>3</sup>, Ruxin Li<sup>1,#</sup>, Zhizhan Xu<sup>1,†</sup>

<sup>1</sup>*State Key Laboratory of High Field Laser Physics, Shanghai Institute of Optics and Fine Mechanics, Chinese Academy of Sciences, Shanghai 201800, China*

<sup>2</sup>*IFSA Collaborative Innovation Center, Shanghai Jiao Tong University, Shanghai 200240, China*

<sup>3</sup>*State Key Laboratory of Intense Pulsed Radiation Simulation and Effect, Northwest Institute of Nuclear Technology, Xi'an 710024, China*

*\*[michaeljs\\_liu@siom.ac.cn](mailto:michaeljs_liu@siom.ac.cn),*

*#[ruxinli@mail.shcnc.ac.cn](mailto:ruxinli@mail.shcnc.ac.cn),*

*†[zzxu@mail.shcnc.ac.cn](mailto:zzxu@mail.shcnc.ac.cn)*

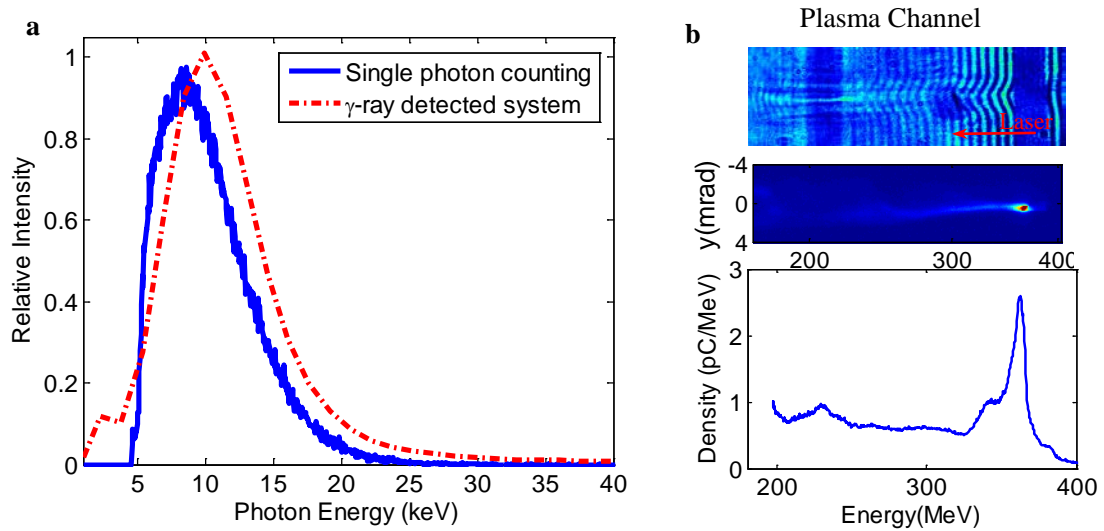

**Supplementary Figure 1 | The betatron x-ray diagnostic and generated e-beam. (a)**

Single-shot x-ray betatron spectra obtained from the single-photon counting method (SPC) method (blue), detected by a thermoelectrically cooled, back-illuminated, deep-depletion x-ray CCD cameras and the residual laser light was blocked by a 80nm-thick Al filter placed in front of the x-ray CCD, comparing with the  $\gamma$ -ray detected system (red), both measured with the critical energy around  $\hbar\omega_c \approx 5.24 \times 10^{-24} \gamma^2 n_e [\text{cm}^{-3}] r_\beta [\mu\text{m}] \text{ keV} \approx (10.5 \pm 1) \text{ keV}$ ; **(b)** The measured plasma channel via the optical interferometry and the corresponding e-beam spectra: peak energy 360MeV, 1.4% rms energy spread, 49.7pC integrated charge, 0.35mrad rms divergence.

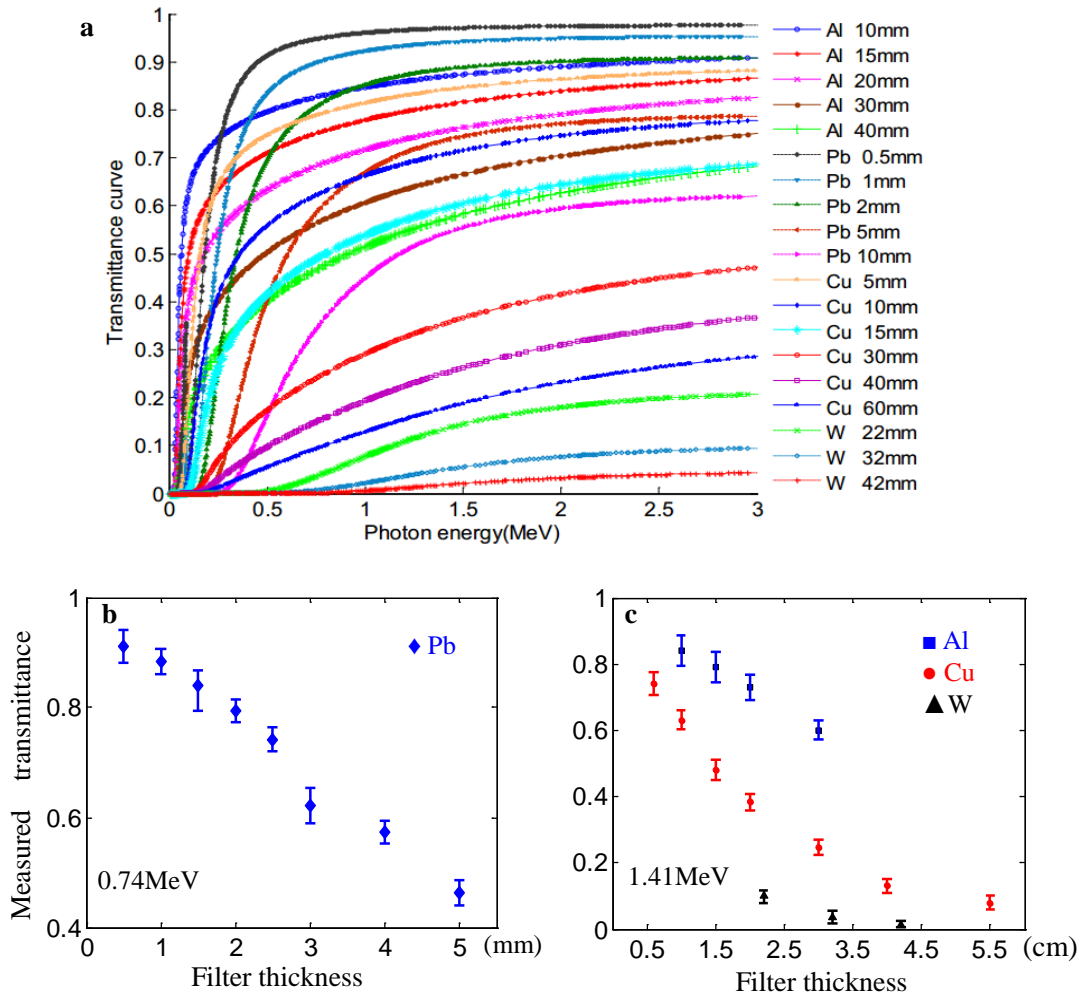

**Supplementary Figure 2 | The material transmittance and measured  $\gamma$ -ray signal including angular correction vs. filter thickness.** (a) Material transmittance of the filters with different thickness for Al (10-40mm), Pb (0.5-10mm), Cu (5-60mm), W (22-42mm); (b-c) Typical transmission data for reconstructing the typical spectra with peak energies at 0.74MeV and 1.41MeV, using a 3 $\times$ 3 squared lead-grid (◆) filter and a sixteen-hole-array filter packed with Al (■), Cu (●) and W (▲) material attenuated bars, respectively. The error bars of each point represents the measurement uncertainties considering the beam spatial profile angular correction.

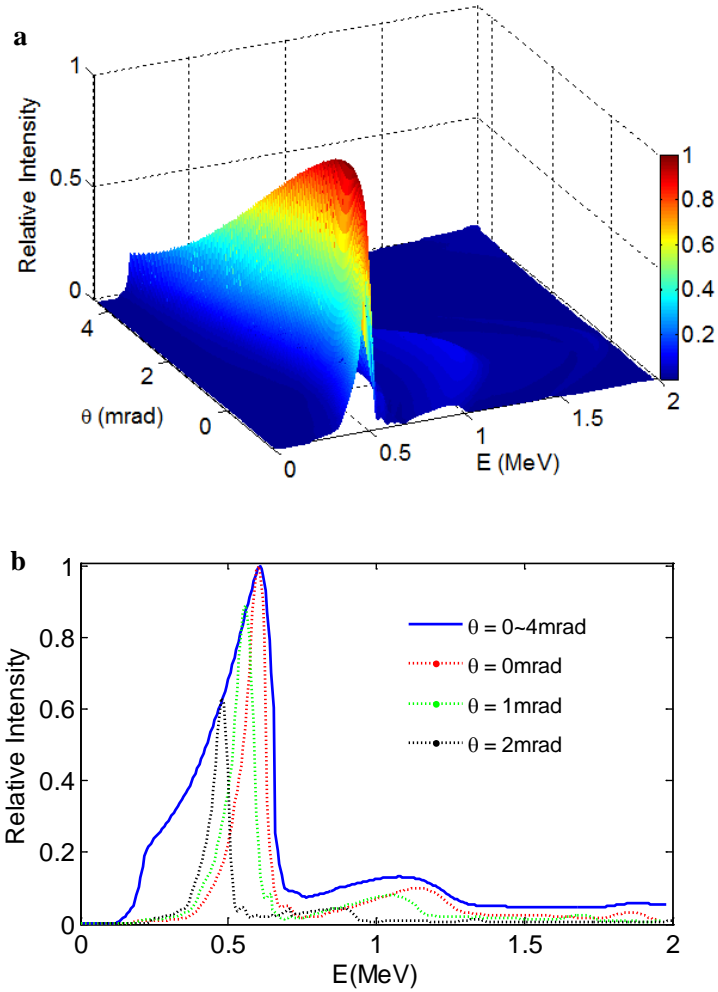

**Supplementary Figure 3 | Spectra radiation simulations.** (a) The 10000 test particles are used to sample an collimating 200 MeV electron beam with 3% FWHM energy spread. Relative radiation intensity distribution for the electrons wiggling in the intense laser field  $N_l=13$ ,  $a_r=0.95$  based on the direct numerical integration of the Lienard-Wiechert potentials in the far field; (b) The angular-resolved radiation intensities integrated with respect to the emission angles from 0 to 4mrad, the center axis  $\theta = 0$  mrad, and off-axis angle detected angle  $\theta = 1$ mrad and  $\theta = 2$ mrad, respectively.
